# Supplementary material
Source: ML conference proceedings conference paper supplement (https://openaccess.thecvf.com/content/CVPR_2019/html/Komarichev_A-CNN_Annularly_Convolutional_CVPR_2019_paper.html)
Supplement: Supplementary file 1 [file Komarichev_A-CNN_Annularly_Convolutional_CVPR_2019_supplemental.zip]

Archive with 3 entries (2 files):
- A-CNN_supplementary_material/
- A-CNN_supplementary_material/A-CNN_supplementary_doc.pdf
- A-CNN_supplementary_material/A-CNN_supplementary_video.mp4
